# Supplementary material for: Lithiation-induced crystal restructuring of hydrothermally prepared Sn/TiO2 nanocrystallite with substantially enhanced capacity and cycling performance for lithium-ion battery
Source: Royal Society of Chemistry journal article supplement (doi:10.1039/c6ra05945g), 2016-01-01
Supplement: c6ra05945g1.pdf [file c6ra05945g1.pdf]

1                                    **Electronic Supplementary information (ESI) for**

2

3 **Lithiation induced crystal restructure of hydrothermal**  
4 **prepared Sn/TiO<sub>2</sub> nanocrystallite with substantial enhanced**  
5 **the capacity and cycling performance for lithium-ion battery**

6

7 *Tsan-Yao Chen<sup>a,b\*</sup>, Yu-Ting Liu<sup>c</sup>, Ping-Ching Wu<sup>d</sup>, Chih-Wei Hu<sup>a</sup>, Po-Wei Yang<sup>a</sup>,*  
8 *Liang-Ching Hsu<sup>c</sup>, Chih-Hao Lee<sup>a</sup>, and Chia-Chin Chang<sup>d\*</sup>*

9

10 Affiliations:

11 *<sup>a</sup> Department of Engineering and System Science, National Tsing Hua University,*  
12 *Hsinchu 30013, Taiwan*

13 *<sup>b</sup> Institute of Nuclear Engineering and Science, National Tsing Hua University,*  
14 *Hsinchu 30013, Taiwan*

15 *<sup>c</sup> Department of Soil and Environmental Science, National Chung Hsing University,*  
16 *Taichung 402, Taiwan*

17 *<sup>d</sup> Department of Greenergy Technology, National University of Tainan, Tainan 7005,*  
18 *Taiwan*

19 \*To whom correspondence should be addressed:

20 Chia-Chin Chang, email: ccchang@mail.nutn.edu.tw ; Tel: +886-6-268-9274 (O);  
21 +886-6-260-2205 (Fax)

22

23 1. Microstructure of Sn doped  $\text{TiO}_2$  (2ST) and  $\text{TiO}_2$

24 The lattice slices for 2 x 2 slabs of (101) facet of  $\text{TiO}_2$ -A and (110) facet of  $\text{TiO}_2$ -  
25 R are shown in Fig. S1. As shown in Fig. S1a, the topmost layer of  $\text{TiO}_2$ -A (101)  
26 facet comprising all Ti atoms with the symmetry of P2. The interatomic distances  
27 between center and Ti atoms at two edge axis are determined to be 5.730 and 5.376 Å  
28 with the interatomic cross angle of  $69.703^\circ / 110.297^\circ$ , respectively. On the other hand,  
29 the topmost layer of  $\text{TiO}_2$  (110) facet comprising Ti and O atoms in the symmetry of  
30 Cmm2. In this slice, the interatomic distances between Ti and O atoms are determined  
31 to be 1.936 / 1.960 Å with the cross angle of  $80.913^\circ / 99.087^\circ$ .  
32

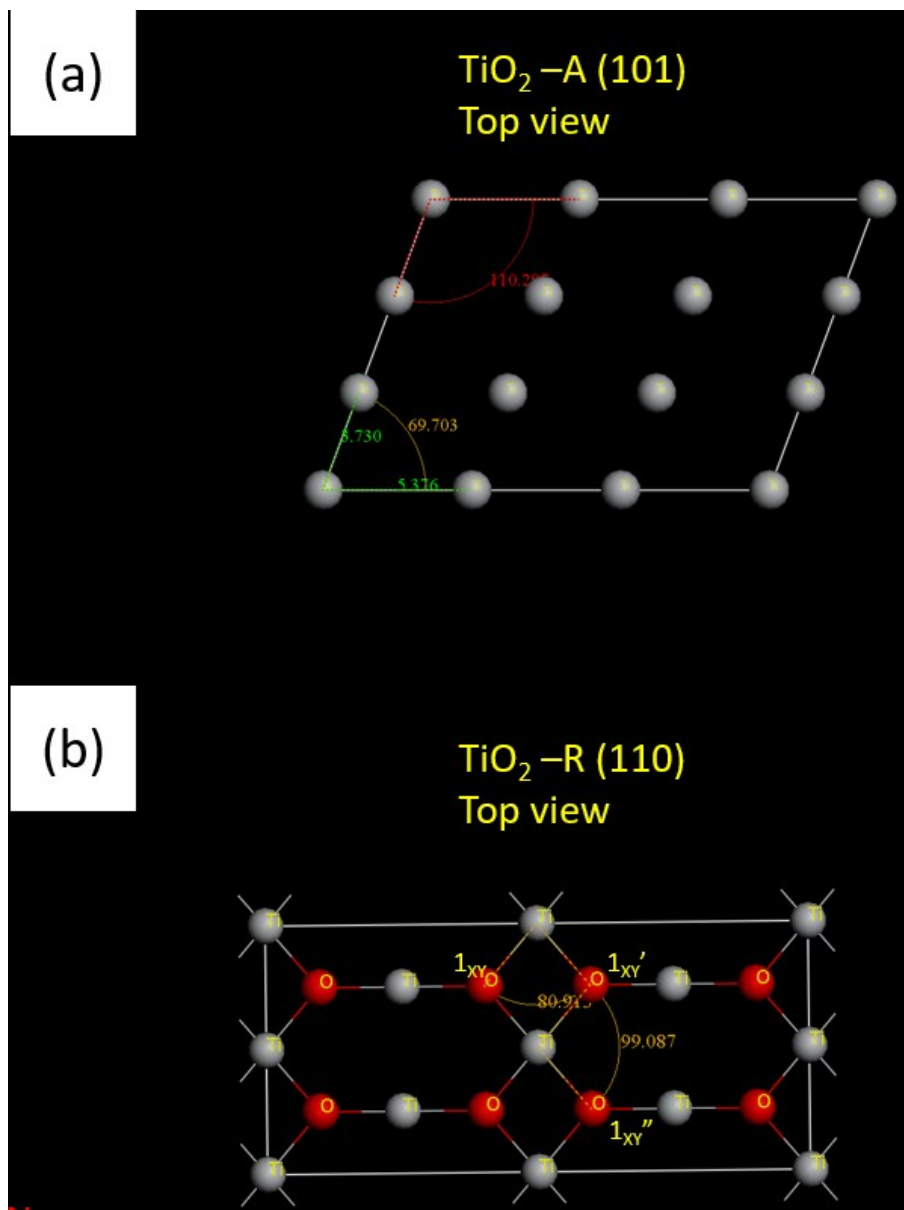

33

34 Fig. S1. The lattice slices for (a) (101) facet of  $\text{TiO}_2$ -A and (b) (110) facet of  $\text{TiO}_2$ -R.

35

36 The microstructure of the experimental negative electrodes were illustrated by  
 37 scanning electron microscopy and transmission electron microscopy. As can be seen,  
 38 there are segregated nanoparticles (in an average size of 3 – 4 nm) segregating at the  
 39 surface of rectangular crystallites (in a size ranging from 100 to 120 nm). Such results  
 40 consistently prove the finding of XRD indicating that the surface segregation of SnO<sub>2</sub>  
 41 at SnTiO<sub>2</sub>. The results of EDX are given in **Table S1**.  
 42

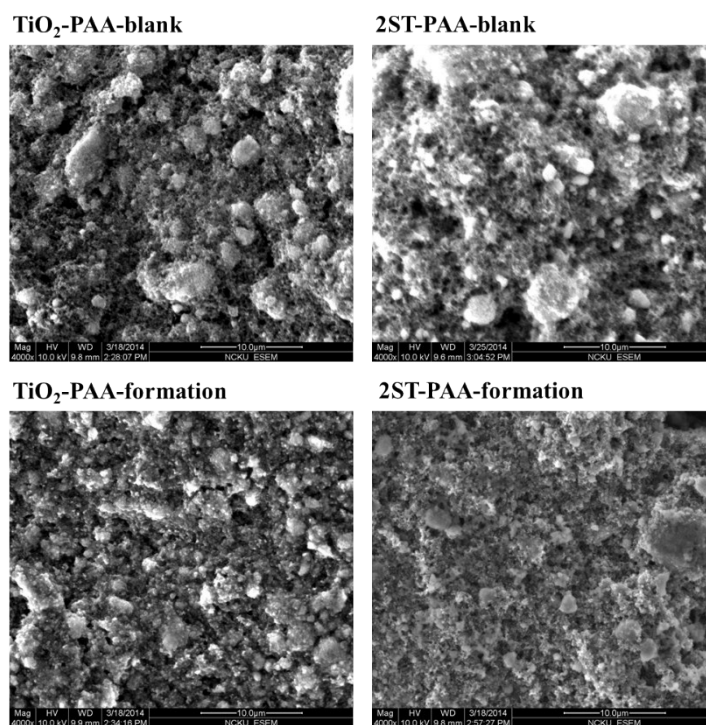

43  
 44 **Fig. S2** The scanning electron microscopy images of TiO<sub>2</sub> and 2ST electrode (with  
 45 the binder of PAA) before (blank) and after (formation) LIB formation.  
 46

47 **Table S1.** The EDX results of 2ST sample

| element | atomic ratio (%) |
|---------|------------------|
| Ti      | 82.4             |
| Sn      | 17.6             |

48  
 49

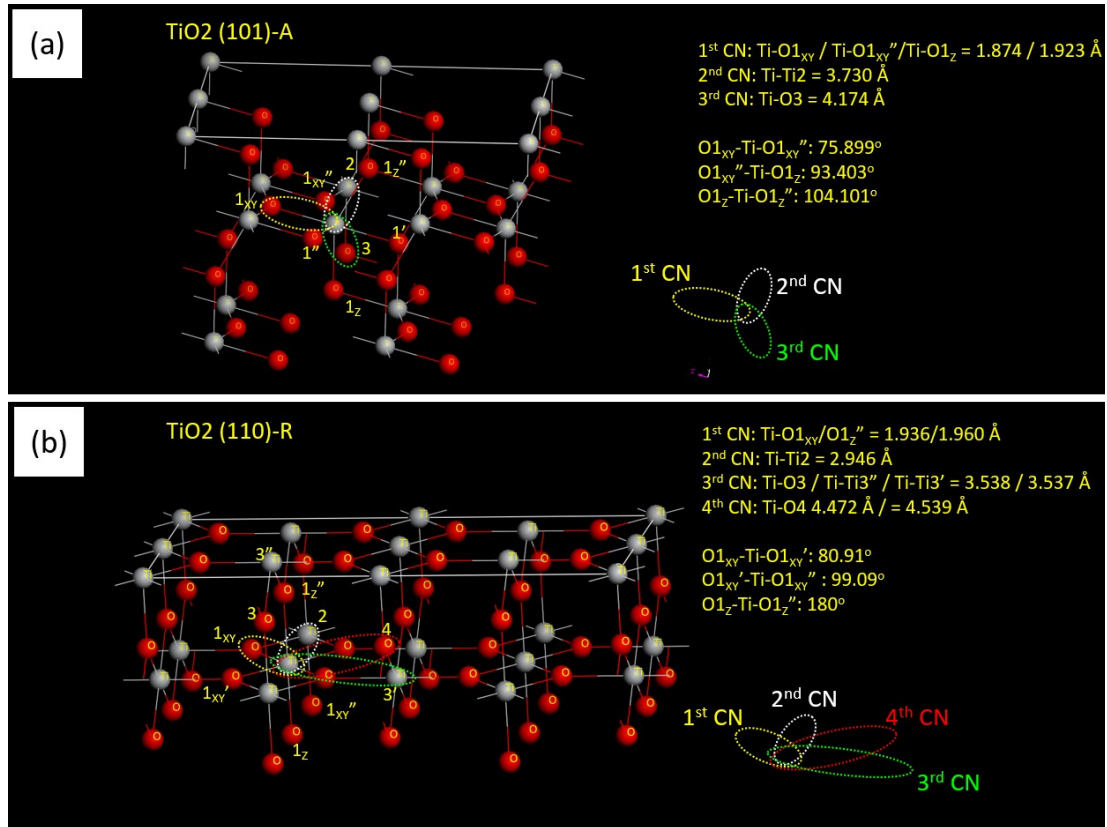

50

51 Fig. S3 Atomic structure model for the (a) (101) facet of TiO<sub>2</sub>-A and (b) (110) facet  
 52 of TiO<sub>2</sub>-R.

53        The atomic structure model for the (101) facet of TiO<sub>2</sub>-A and (110) facet of  
 54 TiO<sub>2</sub>-R are shown in Fig. S3a and S3b, respectively. Accordingly, there are three  
 55 coordination shells including 1<sup>st</sup> CN for Ti-O<sub>1<sub>XY</sub></sub> / TiO<sub>1<sub>XY</sub>'</sub> / TiO<sub>1<sub>Z</sub></sub> with the  
 56 distance of 1.874 / 1.874 / 1.923 Å; 2<sup>nd</sup> CN for Ti-Ti<sub>2</sub> with the distance of 3.730 Å;  
 57 3<sup>rd</sup> CN for Ti-O<sub>3</sub> with the distance of 4.174 Å. The cross angles between O<sub>1<sub>XY</sub></sub>-Ti-  
 58 O<sub>1<sub>XY</sub>'</sub>, O<sub>1<sub>XY</sub>'</sub>-Ti-O<sub>1<sub>Z</sub></sub>, and O<sub>1<sub>Z</sub></sub>-Ti-O<sub>1<sub>Z</sub>'</sub> are determined to be 75.899, 93.403, and  
 59 104.101°, respectively. For the case of TiO<sub>2</sub>-R (110), the local structure in the first  
 60 four CN shell are Ti-O<sub>1<sub>XY</sub></sub>/Ti-O<sub>1<sub>Z</sub>'</sub>, Ti-Ti<sub>2</sub>, Ti-O<sub>3</sub>, Ti-Ti<sub>3</sub>, and Ti-O<sub>4</sub>, respectively.  
 61 In this facet, the cross angles of O<sub>1<sub>XY</sub></sub>-Ti-O<sub>1<sub>XY</sub>'</sub>, O<sub>1<sub>XY</sub>'</sub>-Ti-O<sub>1<sub>XY</sub>'</sub>, and O<sub>1<sub>Z</sub></sub>-Ti-O<sub>1<sub>Z</sub>'</sub>  
 62 are determined to be 80.91, 99.09, and 180°, respectively. These structure information

63 consistently proved the contribution of radial structure peaks in the Ti K-edge EXAFS  
64 spectra of experimental samples Fig. 3.

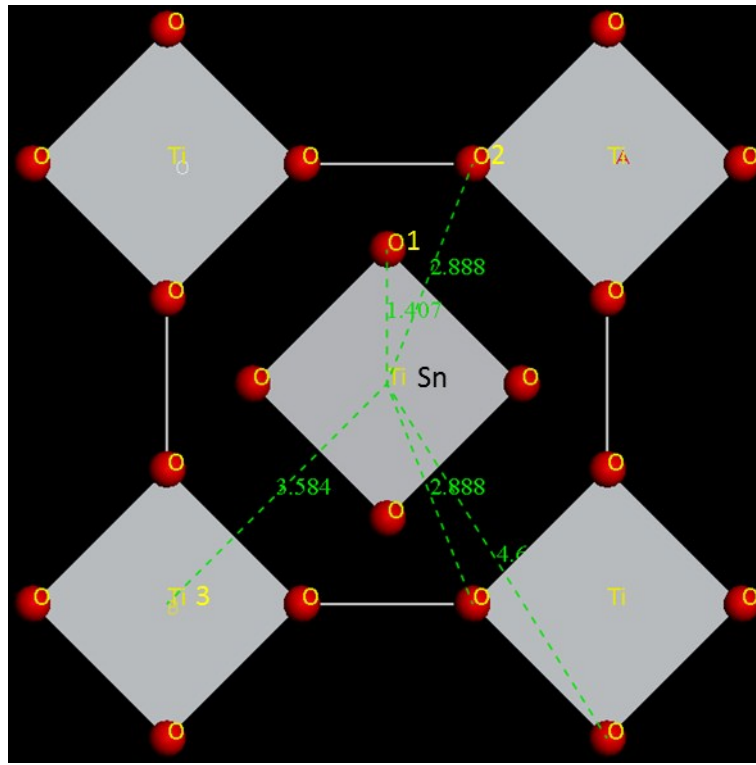

65

66 Fig. S4. The crystal structure with interatomic bond length at the first three  
67 coordination shells (Ti/Sn-O1, Ti/Sn-O2, Ti/Sn-Ti3) of  $\text{Sn}_{0.1}\text{Ti}_{0.9}\text{O}_2$

68

69 2. *Cyclic voltammetry analysis on the negative electrodes of TiO<sub>2</sub> and 2ST in LIB*  
70 *cell*

71 The Cyclic voltammetry sweeping curves of 2ST and TiO<sub>2</sub> powder mixed with 5  
72 wt% of conducting carbon (SBR) and binder (PAA) in negative electrode at the 1<sup>st</sup>  
73 and 2<sup>nd</sup> CV sweeping curve are shown in Fig. S5a and S5b, respectively, with the  
74 voltage scan ranging from 0 to 3.0 volts. In S3a, as clearly shown, there are several  
75 reaction peaks at the 2.0 to 0.8 volts on the 1<sup>st</sup> CV sweeping curve of TiO<sub>2</sub>. These  
76 peaks can be attributed to the formation of surface chelation reaction between the  
77 ligands of binder (PAA) and the OH- sites at different sorption sites of the TiO<sub>2</sub>  
78 surface. For the case of 2ST, the reaction peaks across 1.8 – 0.8 volts shall correspond  
79 to the contributions of surface binder chelation as that were found on TiO<sub>2</sub>. Here, a  
80 substantial enhanced peak is found at 1.3 – 0.8 volts and can be attributed to the  
81 formation of Li<sub>2</sub>O by interacting the Li ions with the SnO<sub>2</sub> ( $\text{SnO}_2 + 4\text{Li}^+ + 4\text{e}^- \rightarrow$   
82  $2\text{Li}_2\text{O} + \text{Sn}$ ) with the subsequent formation of SnLi<sub>x</sub> ( $\text{Sn} + x\text{Li}^+ + x\text{e}^- \rightarrow \text{Li}_x\text{Sn}$ ,  $0 \leq$   
83  $x \leq 4.4$ ) at the low voltage range (0.4 – 0.0 volts). These features reveals the  
84 presence of Li<sub>x</sub>Sn local alloying and the presence of surface SnO<sub>2</sub> residuals on the  
85 freshly prepared 2ST powders. In **Fig. S5b**, the absence of surface chelation and SnO<sub>2</sub>  
86 reduction peaks indicate that the completeness of SnO<sub>2</sub> reduction and formation of  
87 Li<sub>x</sub>Sn in the 1<sup>st</sup> CV cycle.

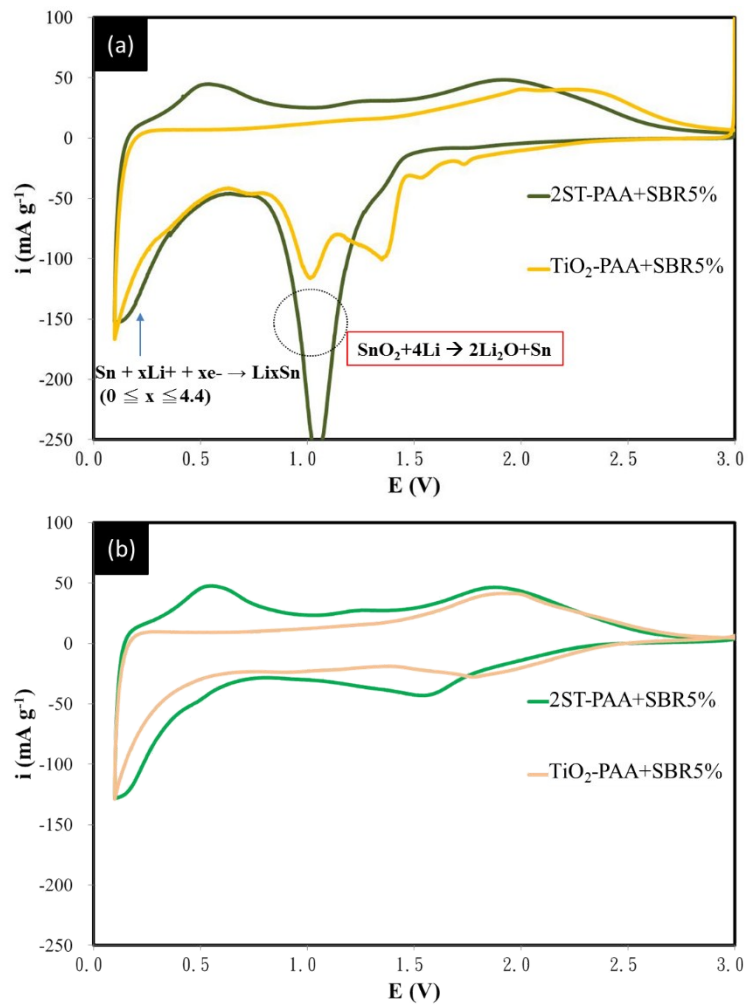

88

89 **Fig. S5.** The cyclic voltammetry sweeping curves of 2ST and  $\text{TiO}_2$  negative electrode  
 90 mixing with 5 wt% of conducting carbon (SP) and binder (PAA) at (a) 1<sup>st</sup> and (b) 2<sup>nd</sup>  
 91 CV cycles.

92

93

94 3. XRD analysis for X-ray window of coin cell “Kapton (polyimide)”

95

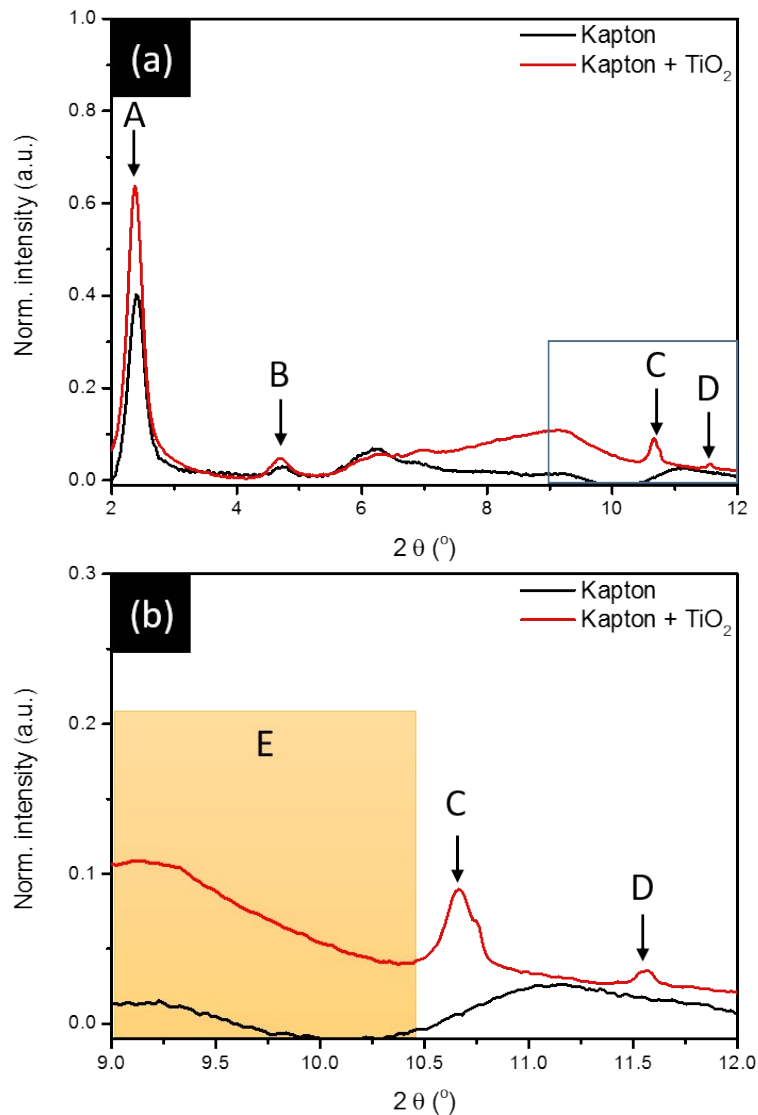

96

97 Fig. S6a XRD patterns of Kapton and Kapton coated with TiO<sub>2</sub> thin film; (b) inset of

98 Fig. S6a (ref: [https://wiki-ext.aps.anl.gov/ug11bm/index.php/Supplies\\_and\\_Tools](https://wiki-ext.aps.anl.gov/ug11bm/index.php/Supplies_and_Tools))

99

100 The XRD pattern of Kapton was compared with that of Kapton coated with TiO<sub>2</sub>

101 thin film in Fig. S6a and S6b. The peaks A and B denote the diffraction lines of

102 kapton film at d spaces of 15.78 and 6.93 Å, respectively. The peaks C and D denote

103 the diffraction lines of (101) and (110) facets for TiO<sub>2</sub>-A and TiO<sub>2</sub>-R, respectively. In

104 the spectrum of Kapton + TiO<sub>2</sub> (Fig. S6b), the background was lifted by the diffusion

105 scattering from the binder and conducting carbon additives in the TiO<sub>2</sub> thin film.



106 Accordingly, no diffraction peaks appear from 9 to 12° on spectrum of Kapton thin  
107 film. It means that, the spectrum features of the negative electrode material in in-situ  
108 experiments were not affected by the diffraction or scattering signals from the Kapton  
109 window.

110

111

#### 112 4. Electrochemical performance of experimental LIB

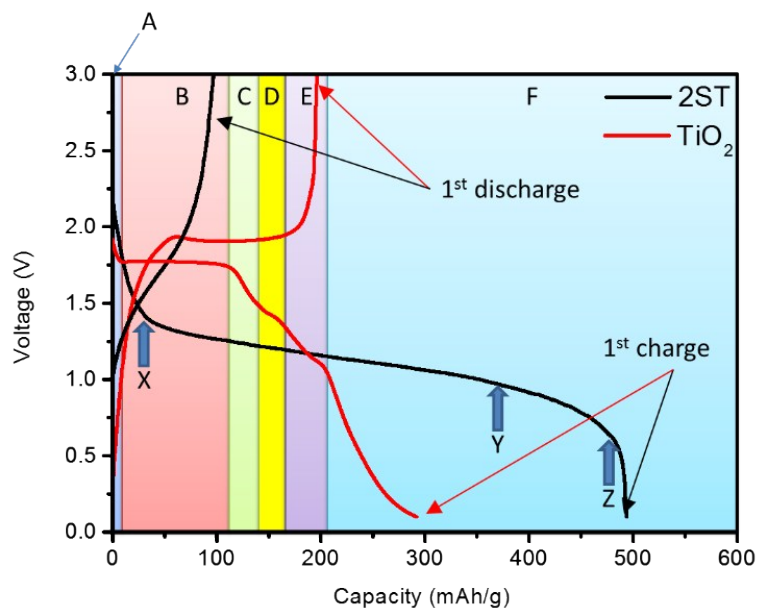

113

114 **Fig. S7** Charge / Discharge (lithiation / delithiation) curves of LIB coin cell with TiO<sub>2</sub>  
115 and 2ST negative electrode during *in-situ* XRD analysis. The current density is set to  
116 be 0.03 mA mg<sup>-1</sup> with the charge/discharge potential from 0.1 to 3.0 V. The  
117 experimental coin cells were assembled and aged for 3 days prior to the in-situ XRD  
118 measurements.

119

120 Fig. S7 shows the charge / discharge (Li insertion / extraction) characteristic  
121 curve (C-E curve) of LIB with TiO<sub>2</sub> and 2ST negative electrode in formation cycle.  
122 The six regions A, B, C, D, E and F (with different Capacity to Voltage slopes) can be  
123 assigned to the features of Li<sup>+</sup> insertion at different chemical (potential) stages of  
124 TiO<sub>2</sub> in LIB. In region A (from 3.0 to 1.75 volt), the voltage drop can be attributed to  
125 the formation of Li insertion site at TiO<sub>2</sub>-R surface. By applying voltage higher than  
126 1.75 volt, a plateau from 10 to 110 mAhg<sup>-1</sup> (region B) is the typical feature for the Li<sup>+</sup>

127 intercalation to ion channel of TiO<sub>2</sub>-R. By increasing capacity from 120 to 210 mAhg<sup>-1</sup>, the slides in regions C (1.75 - 1.52 volt), D (1.52 - 1.41 volt), and E (1.41 - 1.10 volt) were caused by the intercalation of Li<sup>+</sup> into the vacancy sites of distorted TiO<sub>2</sub>-A at the core-shell interface, the formation of Li<sup>+</sup> insertion site at TiO<sub>2</sub>-A surface, and the extrusion of Li<sup>+</sup> to the TiO<sub>2</sub>-A core crystallite. By increasing capacity higher than 210 mAhg<sup>-1</sup> (region F), the dramatic voltage drop reveals the suppression of further Li insertion by the closed pore diffusion barrier at TiO<sub>2</sub>-A core. In this case, the formation of Li<sup>+</sup> pillows consumes certain cell potential and thus results in the gradient distribution in the region F. Upon discharging, the C-E curve shows the typical profile with a gradient of Li<sup>+</sup> diffusion; where a large irreversibility of capacity is found between charge (300 mAhg<sup>-1</sup>) and discharge (200 mAhg<sup>-1</sup>) state. Only one discharge plateau is found from 180 to 60 mAhg<sup>-1</sup> at 1.9 volt. By decreasing the capacity less than 60 mAhg<sup>-1</sup>, potential is dropped from 1.9 to 0.1 volt by completely discharging the LIB. These are typical characters for C-E curves of TiO<sub>2</sub>-A and TiO<sub>2</sub>-R as negative electrode in LIB. After the 1<sup>st</sup> charge-discharge cycle, the ion channels were aligned by the lattice relaxation at the core - shell interface, therefore, resulting in the indistinct stage profile in the regions C to E of TiO<sub>2</sub> (Fig. S8) in the 2<sup>nd</sup> and 3<sup>rd</sup> charge curves. These features prove the formation of pillow (formation of Li<sub>x</sub>TiO<sub>2</sub>) at Li channels which play important role in the irreversibility of TiO<sub>2</sub> as consistently proved by the *in-situ* XRD analysis (Fig. 4b).

147 For 2ST negative electrode in LIB, the cell voltage was dropped from 3.0 to 1.45  
148 volte upon increasing the capacity to 35 mAhg<sup>-1</sup> (denoted by arrow X). This voltage  
149 drop is larger than that of TiO<sub>2</sub> negative electrode and can be attributed to the  
150 formation of Li<sub>2</sub>O and Sn metal (by SnO<sub>2</sub> + 4Li<sup>+</sup> + 4e<sup>-</sup> → 2Li<sub>2</sub>O + Sn reaction at 1.5  
151 to 0.8 V as shown in the CV curve of 2ST Fig. S5) by interactions between SnO<sub>2</sub> and  
152 Li<sup>+</sup>. By further charging the LIB to 360 mAhg<sup>-1</sup>, a slight voltage drop (1.45 to 0.95

153 volt) was found between arrow X and arrow Y. According to *in-situ* XRD results (Fig.  
154 4a), we notice the absence of diffraction lines from 2ST-P in the presence of TiO<sub>2</sub>-R  
155 (110) (peak G) and TiO<sub>2</sub>-A (101) facets (peak E) simultaneously with the Li  
156 intercalated TiO<sub>2</sub>-R (110) (peak G<sub>L</sub>) and TiO<sub>2</sub>-A (101) facets (peak E<sub>L</sub>) in *in-situ*  
157 XRD patterns (Fig. 4) by increasing SOC larger than 5 till 85% (~450 mAhg<sup>-1</sup>). The  
158 progressive potential drop (from 0.85 to 0.71 volt) is caused by the phase transition  
159 from Sn<sub>0.1</sub>Ti<sub>0.9</sub>O<sub>2</sub> to TiO<sub>2</sub>-R and TiO<sub>2</sub>-A by the lattice relaxation and Li<sup>+</sup> intercalation.  
160 Further increasing the capacity till 495 mAhg<sup>-1</sup> causing a dramatic voltage drop to 0.1  
161 volt. This phenomenon can be assigned to the formation of local SnLi<sub>x</sub> alloy (as  
162 consistently revealed by CV analysis in Fig. S5) thus resulting in its superior capacity  
163 comparing to TiO<sub>2</sub>. The irreversibility of 2ST was determined to be 80% (390 mAhg<sup>-1</sup>,  
164 490 →100 mAhg<sup>-1</sup>) which is 2.9-fold higher than that of TiO<sub>2</sub> (33.8%, 295→195  
165 mAhg<sup>-1</sup>). Such abnormal property seemly hindered the application of 2ST in LIB,  
166 however, can be substantially improved by mixing proper amount of conducting  
167 carbon (SP, 20 wt% relative to active materials in our cases). According to the C-E  
168 curves of LIB with SP mixed negative electrodes, the irreversibility of TiO<sub>2</sub> (Fig. S8a)  
169 and 2ST (Fig. S8b) negative electrodes at the charge and discharge states at the first  
170 three CE cycles were reduced to 28/5/5% and 27/6/6%, respectively. It means that the  
171 Li extraction of 2ST is efficiently facilitated by placing the conductive particles in  
172 active material.  
173

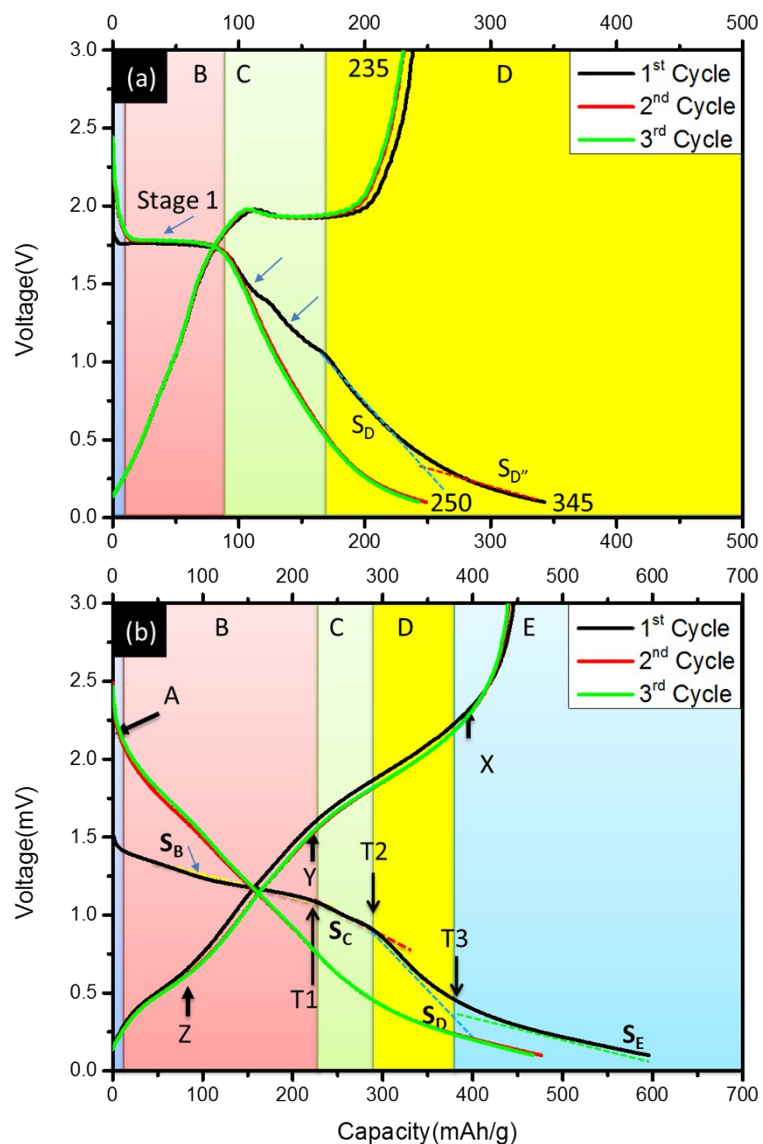

174

175 **Fig. S8** Charge / Discharge (lithiation / delithiation) curves of LIB coin cell with  $\text{TiO}_2$

176 and 2ST negative electrode during *in-situ* XRD analysis. The negative electrode was

177 prepared by mixing the experimental powders with the conductive carbon. The

178 current density is set to be  $0.03 \text{ mA mg}^{-1}$  with the charge/discharge potential from 0.1

179 to 3.0 V.

180

181 5. Electrochemical impedance analysis of half cells containing experimental  
 182 negative electrodes  
 183

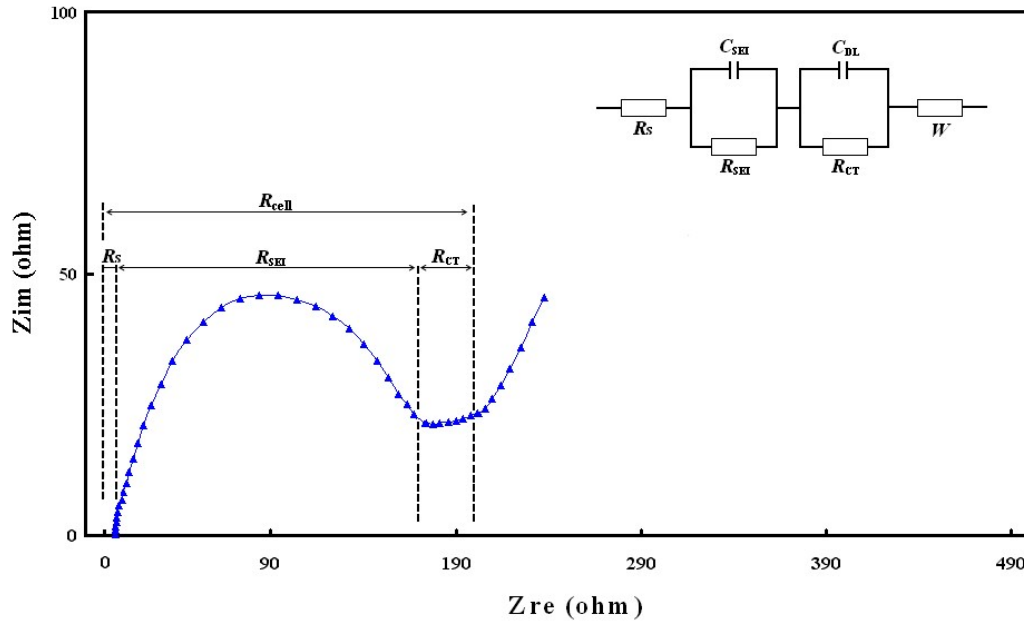

184  
 185 Fig. S9. The proposed electrical equivalent circuit for modeling the EIS spectra of  
 186 experimental LIB.

187  
 188 Table S2. The model simulated electrochemical impedance parameters of half LIB  
 189 cell with (a)  $TiO_2$  ( $TiO_2$ ) and (b)  $Sn_{0.1}Ti_{0.9}O_2$  (2ST-P) negative electrode materials.  
 190 The caption ended by -3D and -3DF denote the EIS spectra of negative electrode  
 191 before and after 1st charge / discharge cycle of LIB, respectively.

| sample                         | $R_s$ (W) | $R_{SEI}$ (W) | $R_{CT}$ (W) |
|--------------------------------|-----------|---------------|--------------|
| <b><math>TiO_2</math> -3D</b>  | 8.61      | 120           | 700          |
| <b><math>TiO_2</math> -3DF</b> | 8.12      | 74.73         | 194.7        |
| <b>2ST-P-3D</b>                | 10.82     | 59            | 97.6         |
| <b>2ST-P-3DF</b>               | 5         | 15            | 73           |

192  
 193

194 6. XPS analysis

195 The XPS spectra of Sn-TiO<sub>2</sub> samples (immersed in electrolyte for 1 hour (ST-  
 196 1H), 3 days (ST-3DAY), and after LIB formation (ST-Formation)) at C 1s, O 1s, Sn  
 197 3d, and Ti 2p<sub>3/2</sub> orbitals were compared in Fig. S10. It clearly shown that the four  
 198 elements (including Sn) were prevailing at particle surface in the sample immersed for  
 199 1 hour. As consistently revealed by result of EDX analysis, the XPS spectra proved  
 200 the presence of Sn composition in the experimental sample. Increasing the immersion  
 201 time or formation of LIB reduced the intensity of emission lines for metal elements  
 202 with the substantially enhanced C1s and O1s peaks. These phenomenon reveals the  
 203 formation of solid state interface atop the active materials.  
 204

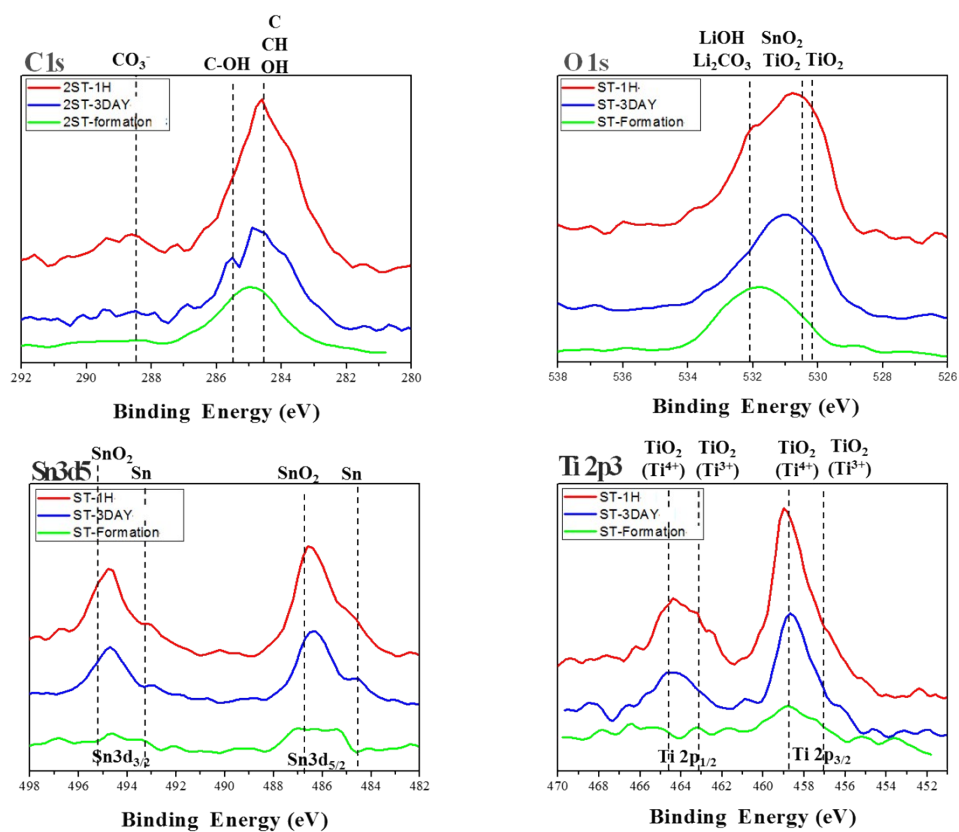

205

206 Fig. S10. The XPS spectra of Sn-TiO<sub>2</sub> samples at C 1s, O 1s, Sn 3d, and Ti 2p<sub>3/2</sub>  
 207 orbitals.

208

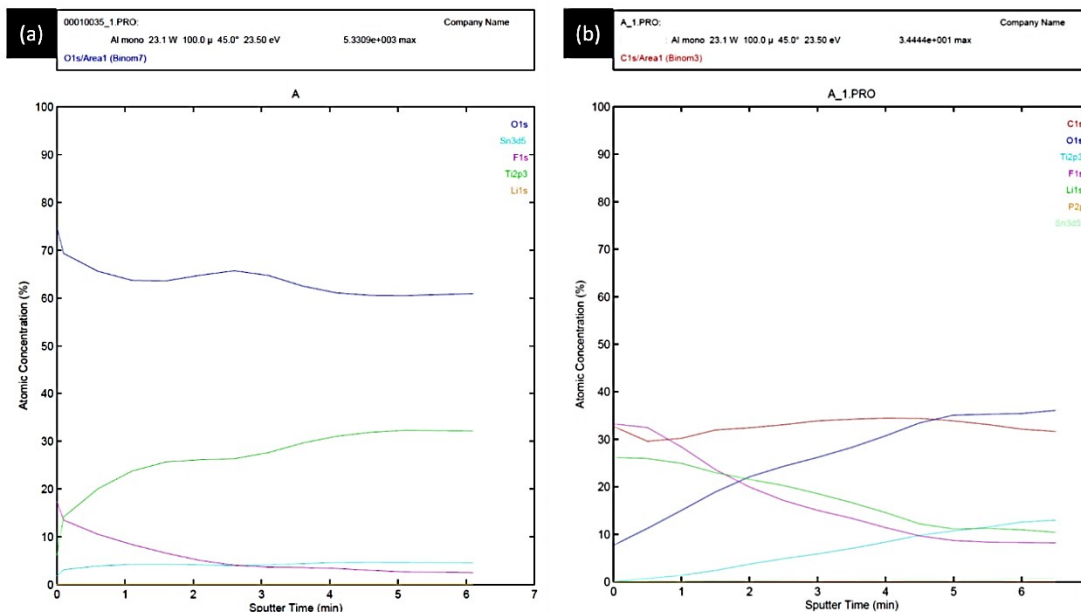

209

210 Fig. S11 The XPS depth profile of (a) freshly prepared 2ST-P electrode and (b) that  
 211 with 250 Charge – Discharge cycles.

212

213 The depth profile of freshly prepared 2ST-P electrode and that with 250 Charge  
 214 – Discharge cycles were demonstrated in Fig. S11. The obtained results indicating the  
 215 presence of Sn at (Fig. 3a) 2ST-P and formation of SEI (as proved by high  
 216 composition of C at the sample surface. The concentration of Sn was determined to be  
 217 4 to 5 at% by increasing the sputter time from 0 to 6 hours at the sputtering rate of 3  
 218 nm per hour vs. Si wafer.
